# Supplementary material for: A series of bis(pyridyl)-bis(amide)-modulated metal-1,2-phenylenediacetate coordination polymers: construction and selective dye adsorption
Source: Royal Society of Chemistry journal article supplement (doi:10.1039/c6ce01970f), 2016-01-01
Supplement: c6ce01970f1.pdf [file c6ce01970f1.pdf]

Supplementary Material (ESI) for CrystEngComm  
This journal is © The Royal Society of Chemistry

**Bis(pyridyl)-bis(amide)-modulated a series of metal-1,2-phenylenediacetate coordination polymers: Construction and selective dye adsorption**

Xiuli Wang,\* Jing Zhao, Mao Le, Hongyan Lin, Guocheng Liu and Xiang Wang

Table S1 Selected bond distances (Å) and angles (°) for complexes 1–5.

| Complex 1                                                                              |            |                     |            |
|----------------------------------------------------------------------------------------|------------|---------------------|------------|
| Cu(1)-O(1)                                                                             | 1.9311(15) | Cu(1)-N(1)          | 2.0425(18) |
| Cu(1)-O(3)#1                                                                           | 1.9962(15) | Cu(1)-O(2)#3        | 2.3355(16) |
| Cu(1)-N(2)#2                                                                           | 2.0314(18) | N(2)#2-Cu(1)-N(1)   | 177.54(7)  |
| O(1)-Cu(1)-O(3)#1                                                                      | 161.73(7)  | O(1)-Cu(1)-O(2)#3   | 111.94(7)  |
| O(1)-Cu(1)-N(2)#2                                                                      | 92.28(7)   | O(3)#1-Cu(1)-O(2)#3 | 86.29(6)   |
| O(3)#1-Cu(1)-N(2)#2                                                                    | 87.51(7)   | N(2)#2-Cu(1)-O(2)#3 | 93.80(7)   |
| O(1)-Cu(1)-N(1)                                                                        | 89.82(7)   | N(1)-Cu(1)-O(2)#3   | 86.59(7)   |
| O(3)#1-Cu(1)-N(1)                                                                      | 90.09(7)   |                     |            |
| Symmetry code for 1: #1 $x - 1, y, z$ ; #2 $x, y + 1, z - 1$ ; #3 $-x, -y + 1, -z + 1$ |            |                     |            |
| Complex 2                                                                              |            |                     |            |
| Cu(1)-O(1)                                                                             | 1.917(3)   | Cu(1)-N(2)#2        | 2.065(3)   |
| Cu(1)-O(4)#1                                                                           | 1.940(3)   | Cu(1)-O(1W)         | 2.298(3)   |
| Cu(1)-N(1)                                                                             | 2.048(3)   | N(1)-Cu(1)-N(2)#2   | 175.71(14) |
| O(1)-Cu(1)-O(4)#1                                                                      | 160.48(12) | O(1)-Cu(1)-O(1W)    | 103.24(11) |
| O(1)-Cu(1)-N(1)                                                                        | 88.79(12)  | O(4)#1-Cu(1)-O(1W)  | 96.20(11)  |
| O(4)#1-Cu(1)-N(1)                                                                      | 90.57(12)  | N(1)-Cu(1)-O(1W)    | 86.99(12)  |
| O(1)-Cu(1)-N(2)#2                                                                      | 90.24(13)  | N(2)#2-Cu(1)-O(1W)  | 89.17(12)  |
| O(4)#1-Cu(1)-N(2)#2                                                                    | 91.75(12)  |                     |            |
| Symmetry code for 2: #1 $x - 1, y, z$ ; #2 $-x - 1, y - 1/2, -z + 3/2$                 |            |                     |            |
| Complex 3                                                                              |            |                     |            |
| Ni(1)-O(4)#1                                                                           | 2.026(2)   | Ni(2)-O(5)          | 2.026(2)   |
| Ni(1)-O(1)                                                                             | 2.056(2)   | Ni(2)-O(3)          | 2.059(2)   |
| Ni(1)-O(6)#1                                                                           | 2.063(2)   | Ni(2)-O(8)#1        | 2.070(2)   |
| Ni(1)-O(1W)                                                                            | 2.080(2)   | Ni(2)-N(3)          | 2.115(3)   |
| Ni(1)-N(1)                                                                             | 2.121(3)   | Ni(2)-O(1W)#3       | 2.119(2)   |
| Ni(1)-N(4)#2                                                                           | 2.179(3)   | Ni(2)-N(2)          | 2.138(3)   |
| O(4)#1-Ni(1)-O(1)                                                                      | 172.98(10) | O(5)-Ni(2)-O(3)     | 99.27(10)  |
| O(4)#1-Ni(1)-O(6)#1                                                                    | 99.09(10)  | O(5)-Ni(2)-O(8)#1   | 174.75(10) |
| O(1)-Ni(1)-O(6)#1                                                                      | 86.22(10)  | O(3)-Ni(2)-O(8)#1   | 85.44(10)  |
| O(4)#1-Ni(1)-O(1W)                                                                     | 90.78(9)   | O(5)-Ni(2)-N(3)     | 90.28(10)  |
| O(1)-Ni(1)-O(1W)                                                                       | 93.65(9)   | O(3)-Ni(2)-N(3)     | 82.35(10)  |
| O(6)#1-Ni(1)-O(1W)                                                                     | 91.96(9)   | O(8)#1-Ni(2)-N(3)   | 88.07(11)  |
| O(4)#1-Ni(1)-N(1)                                                                      | 87.28(10)  | O(5)-Ni(2)-O(1W)#3  | 90.60(9)   |
| O(1)-Ni(1)-N(1)                                                                        | 88.87(11)  | O(3)-Ni(2)-O(1W)#3  | 91.70(9)   |

**Supplementary Material (ESI) for CrystEngComm**  
**This journal is © The Royal Society of Chemistry**

---

|                     |            |                      |            |
|---------------------|------------|----------------------|------------|
| O(6)#1-Ni(1)-N(1)   | 82.48(10)  | O(8)#1-Ni(2)-O(1W)#3 | 91.56(9)   |
| O(1W)-Ni(1)-N(1)    | 173.74(10) | N(3)-Ni(2)-O(1W)#3   | 174.05(10) |
| O(4)#1-Ni(1)-N(4)#2 | 85.96(11)  | O(5)-Ni(2)-N(2)      | 86.82(11)  |
| O(1)-Ni(1)-N(4)#2   | 88.84(11)  | O(3)-Ni(2)-N(2)      | 173.27(10) |
| O(6)#1-Ni(1)-N(4)#2 | 174.82(11) | O(8)#1-Ni(2)-N(2)    | 88.36(10)  |
| O(1W)-Ni(1)-N(4)#2  | 86.77(10)  | N(3)-Ni(2)-N(2)      | 94.85(11)  |
| N(1)-Ni(1)-N(4)#2   | 99.02(11)  | O(1W)#3-Ni(2)-N(2)   | 91.08(10)  |

Symmetry code for **3**: #1  $x + 1/2, -y + 1/2, -z$ ; #2  $-x, y, -z - 1/2$ ; #3  $x - 1/2, -y + 1/2, -z$

**Complex 4**

|                     |           |                     |            |
|---------------------|-----------|---------------------|------------|
| Cu(1)-O(2)#1        | 1.944(5)  | Cu(2)-O(1)          | 1.957(5)   |
| Cu(1)-O(6)          | 1.960(4)  | Cu(2)-O(6)#4        | 1.947(4)   |
| Cu(1)-O(6)#2        | 1.993(5)  | Cu(2)-O(6)          | 1.947(4)   |
| Cu(1)-N(1)          | 2.067(6)  | Cu(2)-O(1)#4        | 1.957(5)   |
| Cu(1)-O(3)#3        | 2.235(5)  | O(6)#2-Cu(1)-O(3)#3 | 87.36(19)  |
| O(2)#1-Cu(1)-O(6)   | 163.8(2)  | N(1)-Cu(1)-O(3)#3   | 93.7(2)    |
| O(2)#1-Cu(1)-O(6)#2 | 91.2(2)   | O(6)#4-Cu(2)-O(6)   | 180        |
| O(6)-Cu(1)-O(6)#2   | 81.3(2)   | O(6)#4-Cu(2)-O(1)#4 | 86.81(19)  |
| O(2)#1-Cu(1)-N(1)   | 88.0(2)   | O(6)-Cu(2)-O(1)#4   | 93.19(19)  |
| O(6)-Cu(1)-N(1)     | 99.2(2)   | O(6)#4-Cu(2)-O(1)   | 93.19(19)  |
| O(6)#2-Cu(1)-N(1)   | 178.8(2)  | O(6)-Cu(2)-O(1)     | 86.81(19)  |
| O(2)#1-Cu(1)-O(3)#3 | 102.1(2)  | O(1)#4-Cu(2)-O(1)   | 180.000(2) |
| O(6)-Cu(1)-O(3)#3   | 91.91(18) |                     |            |

Symmetry code for **4**: #1  $x - 1, y, z$ ; #2  $-x, -y + 1, -z + 1$ ; #3  $x - 1, y - 1, z$ ; #4  $-x + 1, -y + 1, -z + 1$

**Complex 5**

|                     |            |                     |            |
|---------------------|------------|---------------------|------------|
| Co(1)-O(1)          | 2.0513(14) | Co(1)-O(3)#2        | 2.1309(14) |
| Co(1)-O(2)#1        | 2.0575(13) | Co(1)-N(1)          | 2.1616(16) |
| Co(1)-O(1W)         | 2.0763(16) | Co(1)-O(4)#2        | 2.2082(13) |
| O(1)-Co(1)-O(2)#1   | 94.44(6)   | O(1W)-Co(1)-N(1)    | 174.86(7)  |
| O(1)-Co(1)-O(1W)    | 97.86(7)   | O(3)#2-Co(1)-N(1)   | 85.11(6)   |
| O(2)#1-Co(1)-O(1W)  | 90.40(6)   | O(1)-Co(1)-O(4)#2   | 106.50(5)  |
| O(1)-Co(1)-O(3)#2   | 164.08(6)  | O(2)#1-Co(1)-O(4)#2 | 158.93(6)  |
| O(2)#1-Co(1)-O(3)#2 | 99.12(6)   | O(1W)-Co(1)-O(4)#2  | 84.48(6)   |
| O(1W)-Co(1)-O(3)#2  | 90.39(7)   | O(3)#2-Co(1)-O(4)#2 | 60.59(5)   |
| O(1)-Co(1)-N(1)     | 87.11(6)   | N(1)-Co(1)-O(4)#2   | 95.41(6)   |
| O(2)#1-Co(1)-N(1)   | 87.88(6)   |                     |            |

Symmetry code for **5**: #1  $-x, y - 1/2, -z + 1/2$ ; #2  $-x, -y, -z + 1$

---

Table S2. Selected hydrogen-bonding geometry (Å, °) for complex 1–3

| Complex  | D–H···A                          | D–H  | H···A | D···A  | D–H···A |
|----------|----------------------------------|------|-------|--------|---------|
| <b>1</b> | N(3)–H(3B)···O(2W) <sup>i</sup>  | 0.86 | 2.04  | 2.8488 | 157     |
|          | O(2W)–H(2WB)···O(4)              | 0.85 | 2.02  | 2.6870 | 135     |
| <b>2</b> | N(3)–H(3A)···O(3) <sup>iii</sup> | 0.86 | 2.27  | 3.1133 | 167     |
| <b>3</b> | N(5)–H(5B)···O(12) <sup>iv</sup> | 0.86 | 2.03  | 2.8592 | 163     |

Symmetry code: <sup>i</sup>  $1-x, -y, 1-z$ ; <sup>ii</sup>  $1-x, -1/2+y, 1/2-z$ ; <sup>iii</sup>  $2-x, 1-y, 1-z$ ; <sup>iv</sup>  $3/2-x, -1/2+y, z$

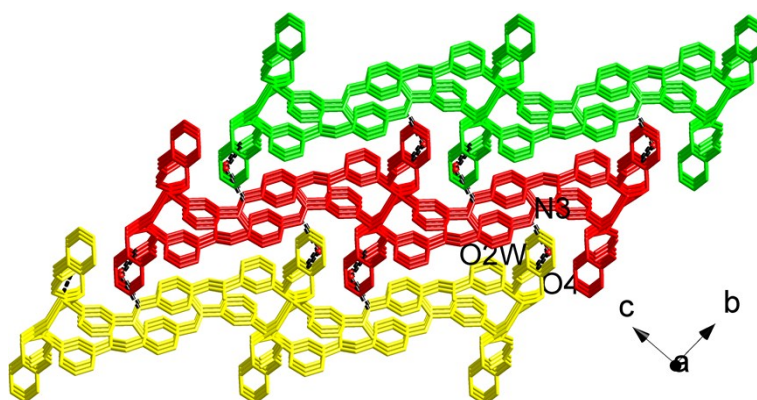

Fig. S1 View of 3D supramolecular architecture of 1.

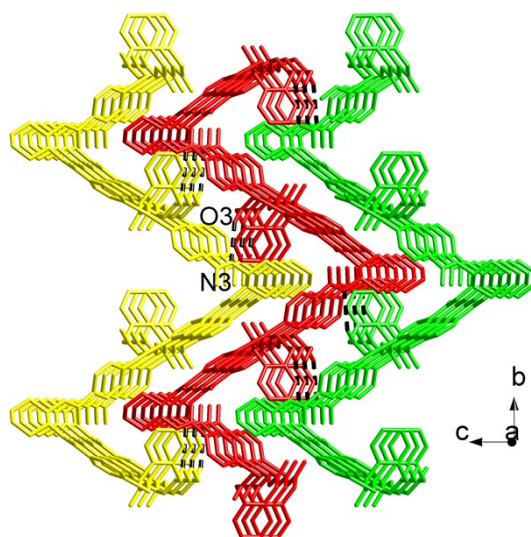

Fig. S2 View of 3D supramolecular architecture of 2.

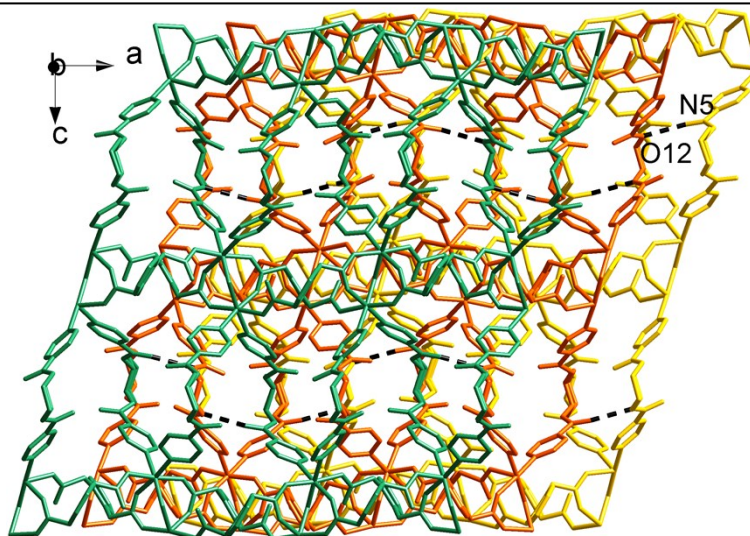

Fig. S3 View of 3D supramolecular architecture of 3.

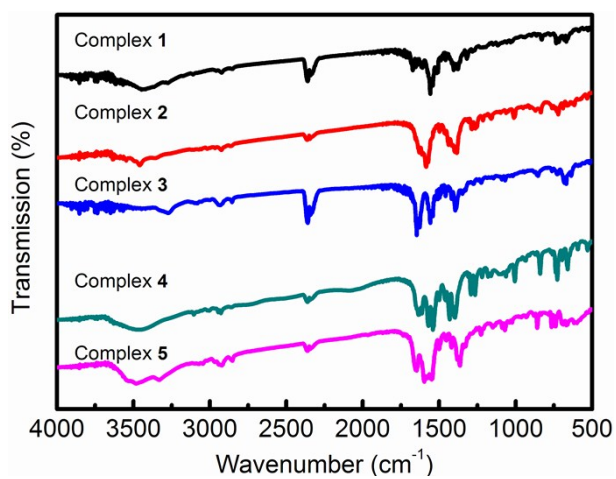

Fig. S4 The IR spectra of complexes 1–5.

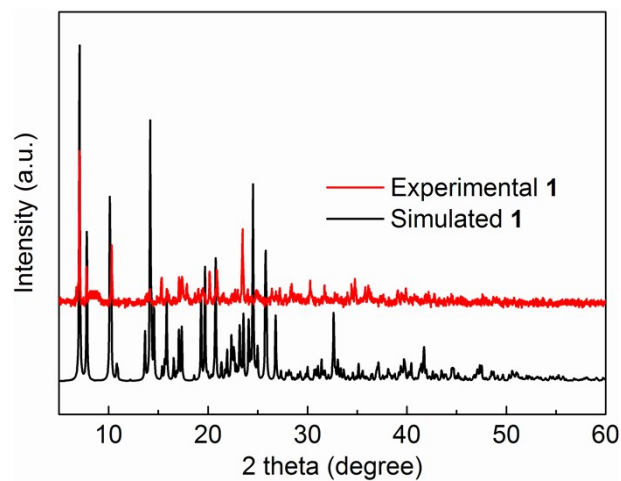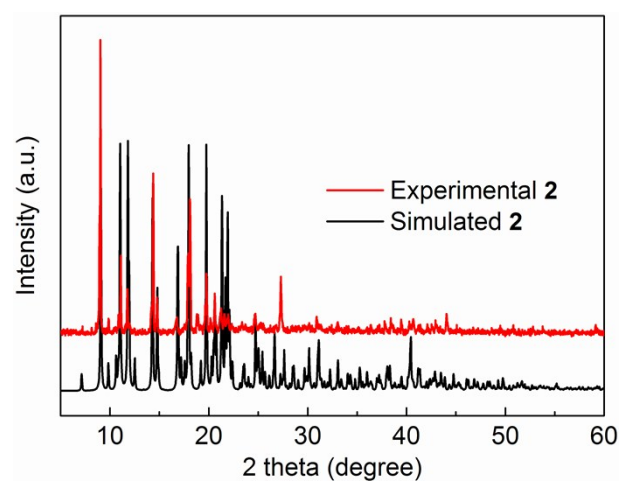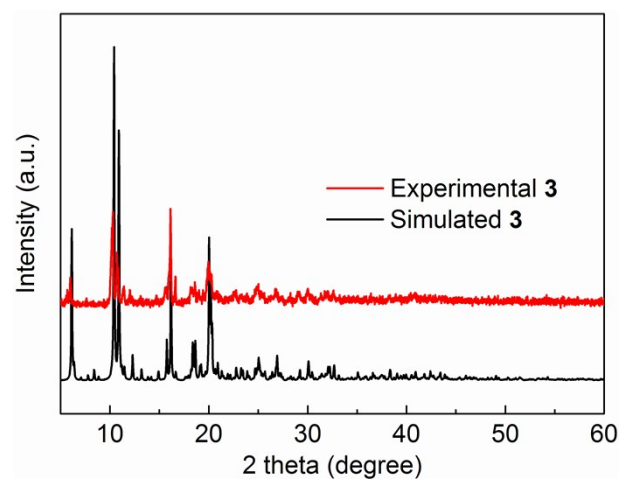

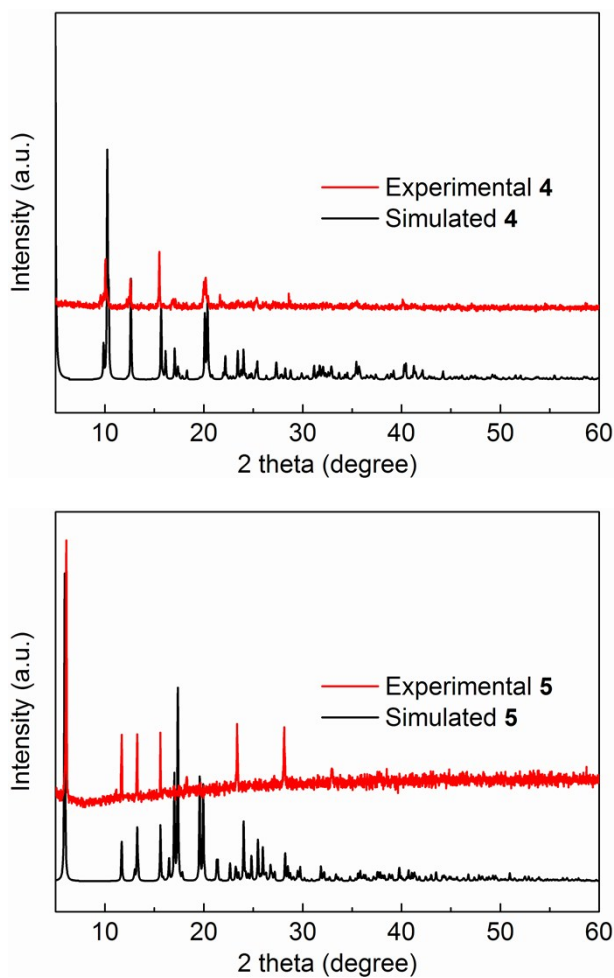

**Fig. S5** The simulated (black line) and experimental (red line) powder X-ray diffraction patterns for complexes 1–5.

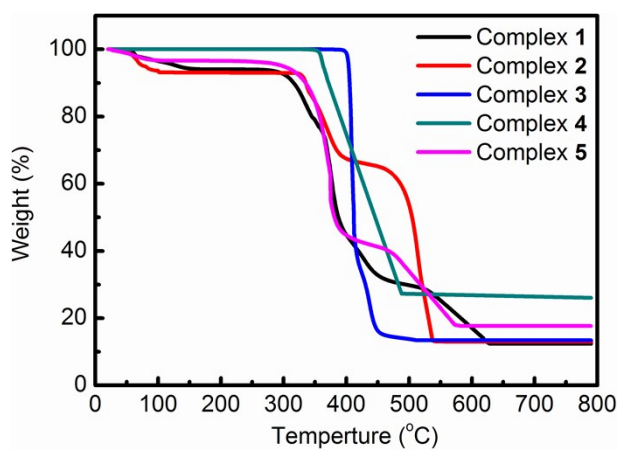

**Fig. S6** The TG curves of complexes 1–5.

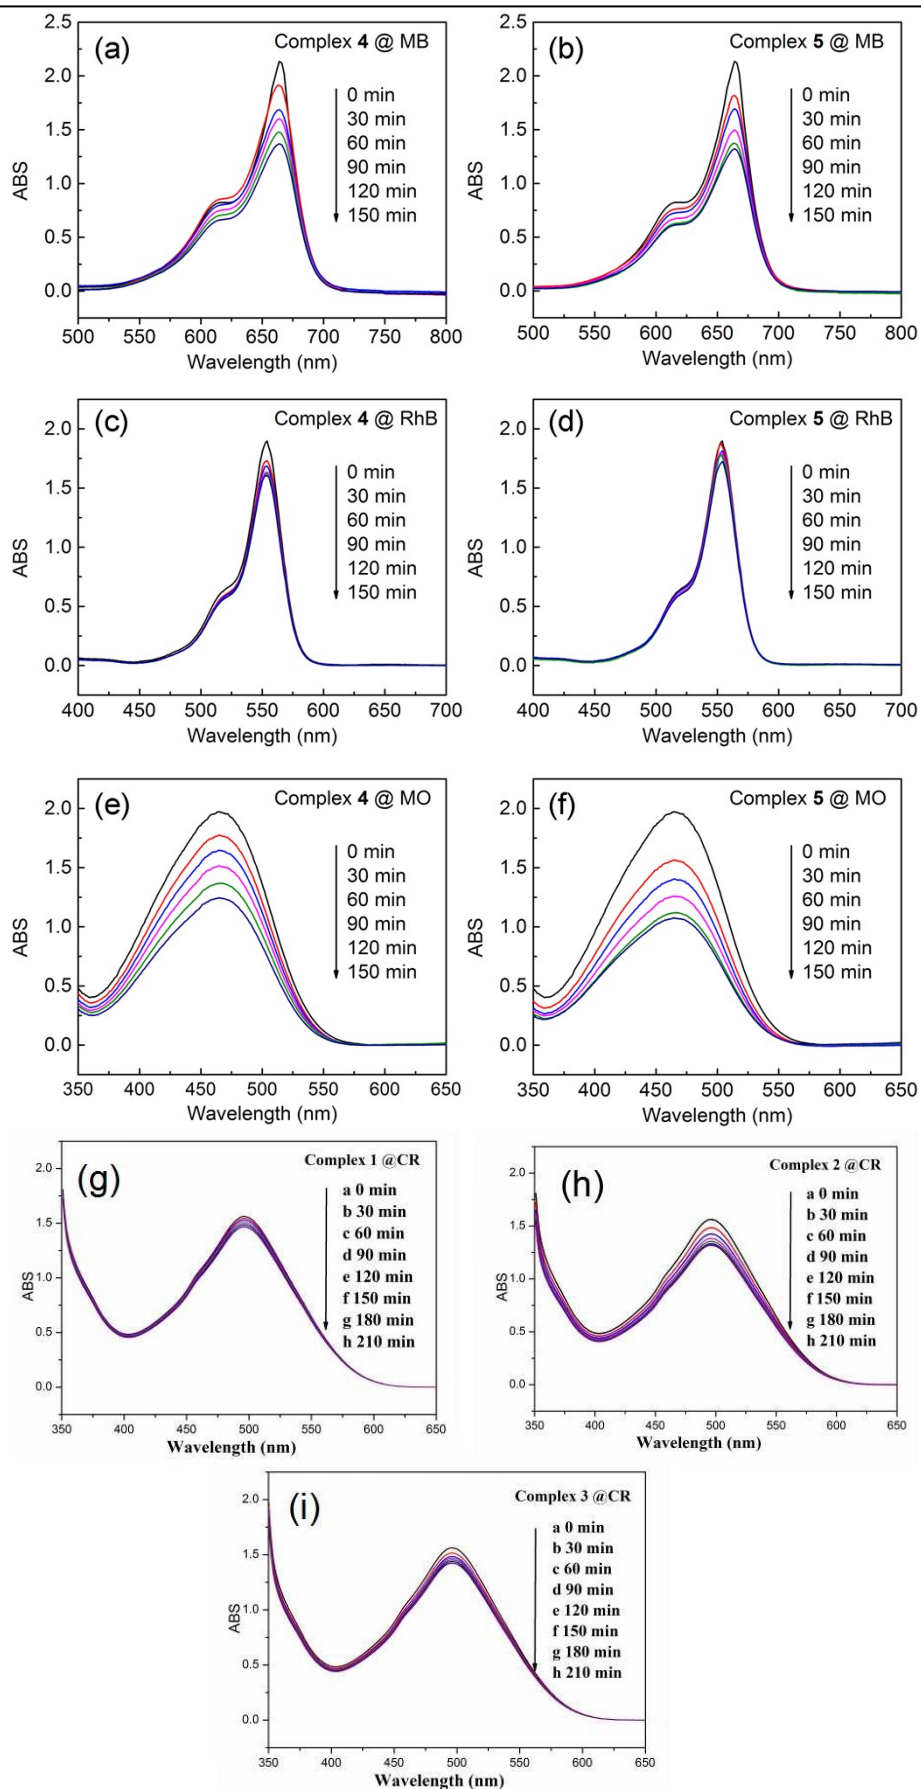

**Fig. S7** UV-vis absorption spectra of the MB (a), RhB (c) and MO (e) solutions after 150 min with complex **4** in dark; UV-vis spectra of the MB (b), RhB (d) and MO (f) solutions after 150 min with complex **5** in dark; UV-vis spectra of the CR solutions after 210 min with complex **1** (g), **2** (h) and **3** (i) in dark.
